# Supplementary material
Source: PubMed Central journal article supplement (PMC6309561)

**Supporting Information for:**

**Determining Allele-Specific Protein Expression (ASPE) Using a Novel QconCAT-Based  
Proteomics Method**

Jian Shi <sup>1</sup>, Xinwen Wang <sup>1</sup>, Huaijun Zhu <sup>1,2</sup>, Hui Jiang <sup>3</sup>,  
Danxin Wang <sup>4</sup>, Alexey Nesvizhskii <sup>5</sup>, Hao-Jie Zhu <sup>1\*</sup>

<sup>1</sup> Department of Clinical Pharmacy, University of Michigan, Ann Arbor, MI 48109; <sup>2</sup> Department of Pharmacy, Drum Tower Hospital Affiliated to Medical School of Nanjing University, Nanjing, Jiangsu, China; <sup>3</sup> Department of Biostatistics, University of Michigan, Ann Arbor, MI 48109; <sup>4</sup> Department of Cancer Biology and Genetics, Center for Pharmacogenomics, School of Medicine, Ohio State University, Columbus, OH 43210; <sup>5</sup> Department of Pathology, Department of Computational Medicine and Bioinformatics, University of Michigan, Ann Arbor, MI 48109

**Table of Contents**

**Table S1.** Sequences, precursor charge, m/z, and retention time of the target peptides

**Table S2:** DNA sequences of the primers for the reverse-transcription PCR and SNaPshot assays

**Figure S1.** Preparation of UGT2B15 QconCAT internal standard protein

**Figure S2.** Chromatograms of the tryptic peptides for the quantification of the ASPE of *UGT2B15*

**Table S1.** Sequences, precursor charge, m/z, and retention time of the target peptides. Blue and bold K and R indicated the heavy stable isotope-labeled internal standard peptides from QconCAT.

| Peptide Sequence  | Precursor Charge | Precursor m/z | Retention Time (min) |
|-------------------|------------------|---------------|----------------------|
| NYLEDSLLK         | 2                | 547.7900      | 9.4                  |
| NYLEDSLL <b>K</b> | 2                | 550.8001      | 9.4                  |
| NDLEDSLLK         | 2                | 523.7719      | 8.6                  |
| NDLEDSLL <b>K</b> | 2                | 526.7819      | 8.6                  |

**Table S2:** DNA sequences of the primers for the reverse-transcription PCR and SNaPshot assays

|                           |                                     |
|---------------------------|-------------------------------------|
| Reverse-transcription PCR |                                     |
| Forward primer            | 5'-TCAATGCCAGTAAATCATCTGC-3'        |
| Reverse primer            | 5'-TCGAGAATTTTCAGAAGAGAATCT-3'      |
| SNaPshot                  |                                     |
| Forward primer            | 5'-TCGGCTTCTACTCTTGTCAATGC-3'       |
| Reverse primer            | 5'-TTGAAACACCATATATCCATCTATCGAGA-3' |
| Extension primer          | 5'-AATTTTCAGAAGAGAATCTTCCAAAT-3'    |

**Figure S1.** Preparation of UGT2B15 QconCAT internal standard protein. The QconCAT protein was accumulated in the Elute Fraction 2 during HisTrap affinity column purification.

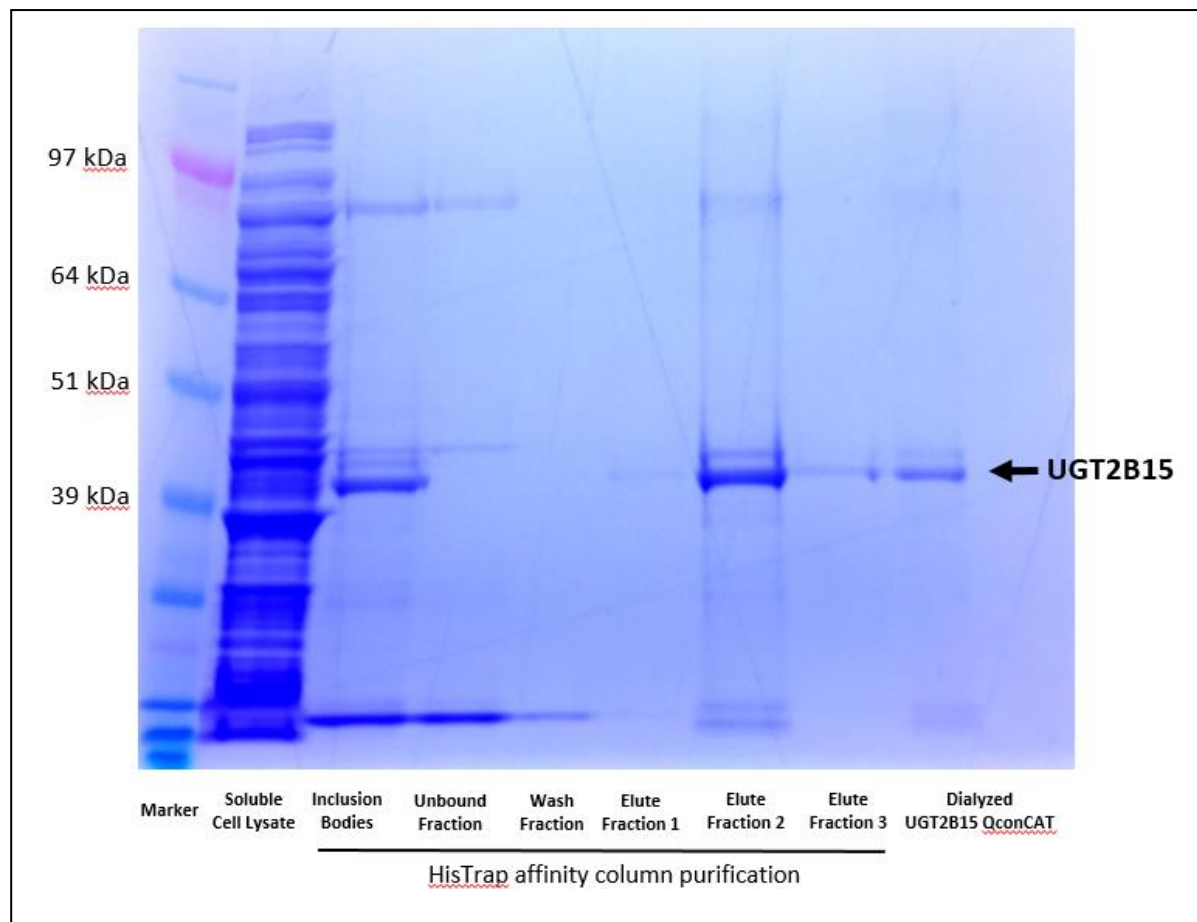

**Figure S2.** Chromatograms of the tryptic peptides for the quantification of the ASPE of *UGT2B15*. The peptide NYLED<sup>N</sup>SLLK and the Y85D variant peptide NDLED<sup>N</sup>SLLK were used for the quantification of the wild type and mutant alleles of *UGT2B15*, respectively. Quantification was based on the peak area ratios of the light peptides to the heavy peptides from the QconCAT standard.

**Chromatograms of the UGT2B15 tryptic peptide NYLED<sup>N</sup>SLLK (light)**

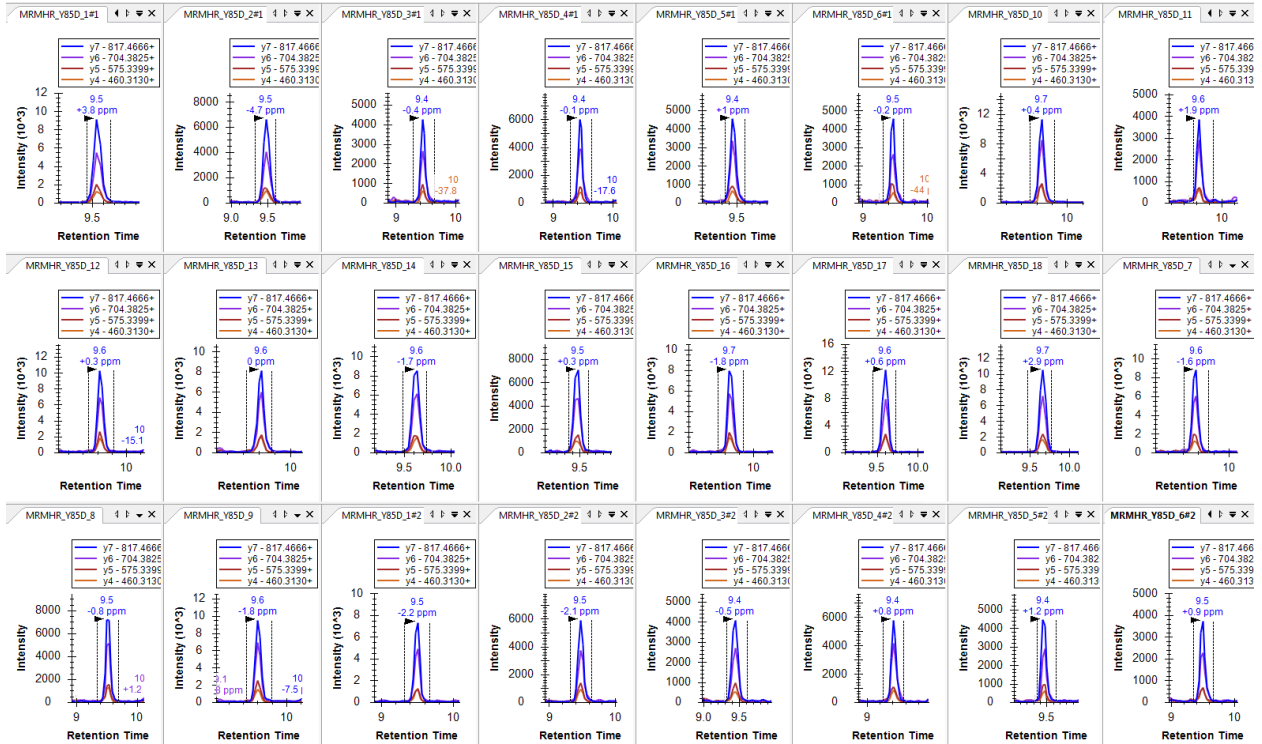

**Chromatograms of the UGT2B15 tryptic peptide NYLED<sup>N</sup>SLLK (heavy)**

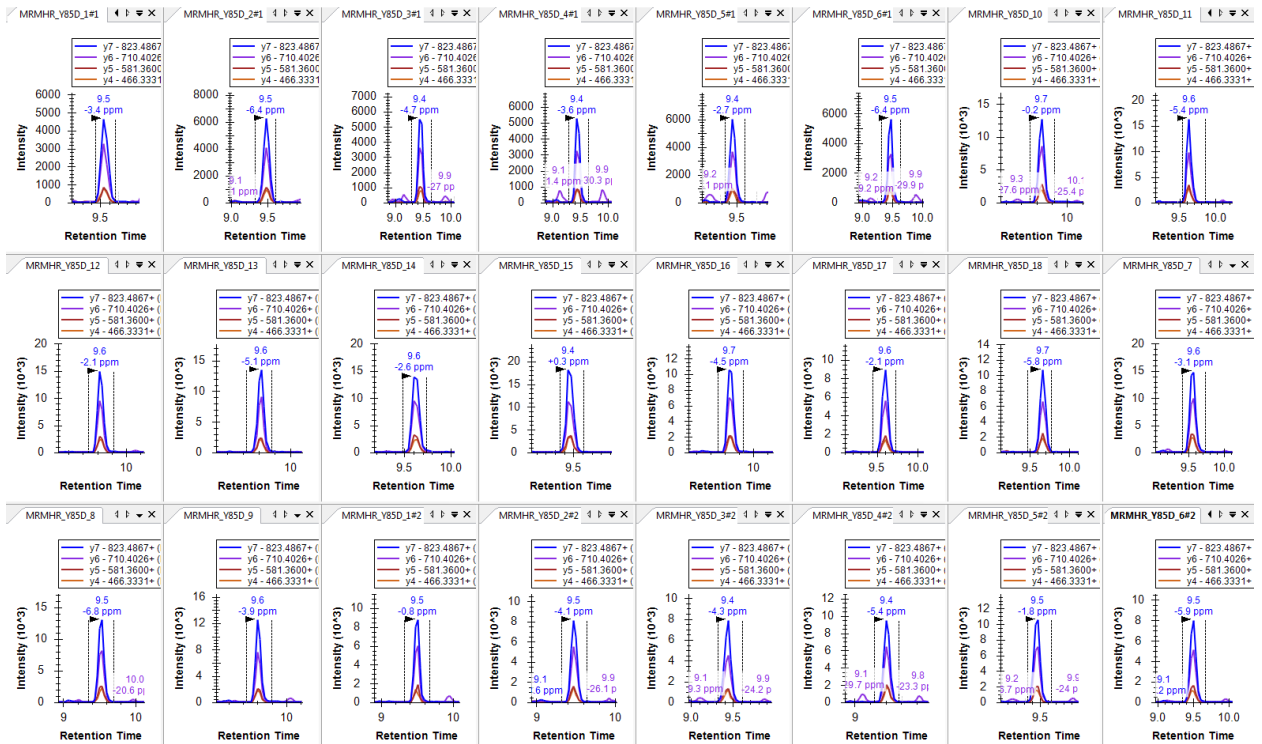

Chromatograms of the UGT2B15 Y85D variant peptide NDLEDSLK (light)

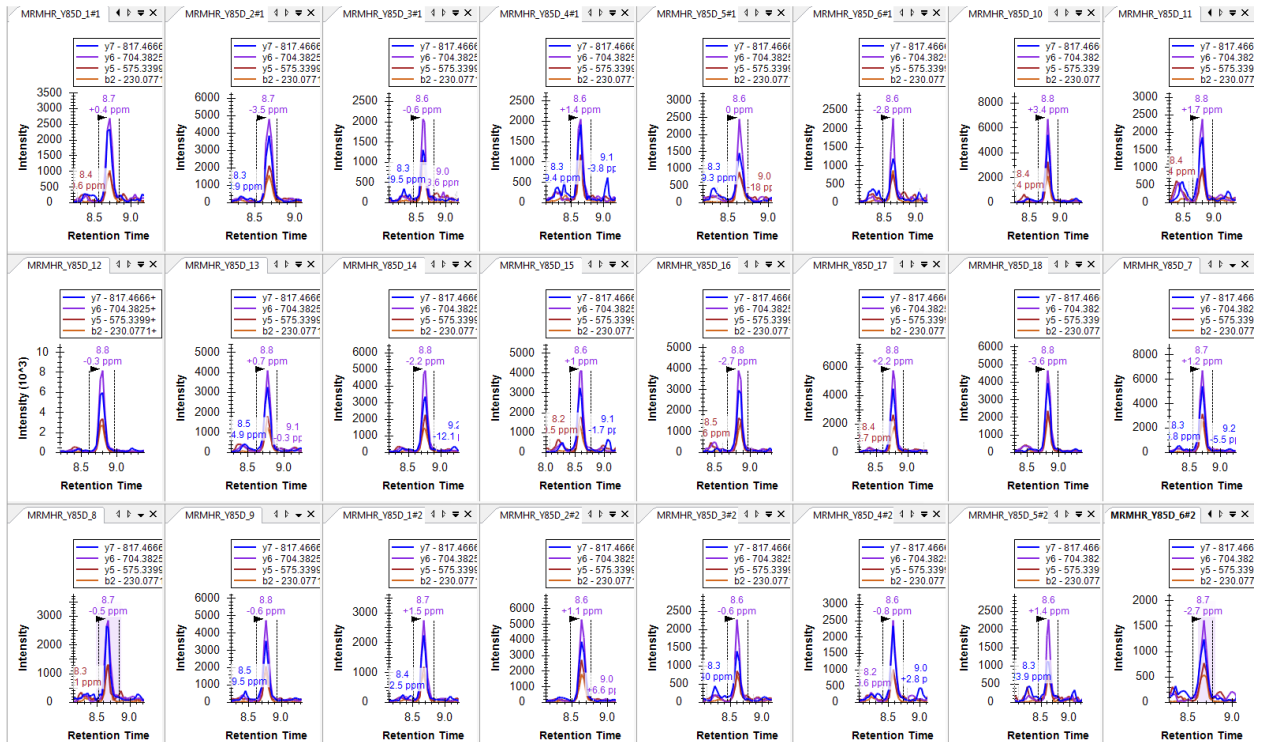

Chromatograms of the UGT2B15 Y85D variant peptide NDLEDSLK (heavy)

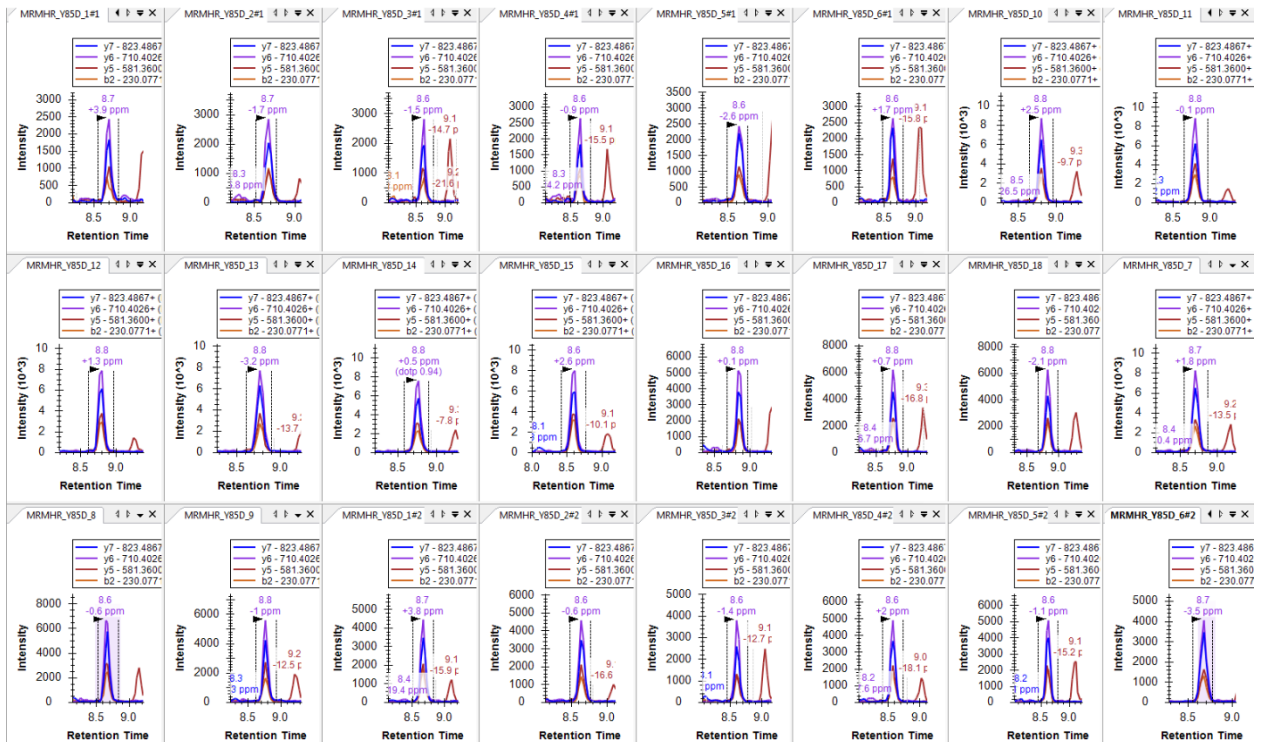

Supplement: NIHMS1000614-supplement-Supplemental.pdf [file NIHMS1000614-supplement-Supplemental.pdf]
